# Supplementary material
Source: PubMed Central journal article supplement (PMC5589091)
Supplement: mmc1.pdf [file mmc1.pdf]

YMTHE, Volume 25

## **Supplemental Information**

### **Characterization of circRNA-Associated-ceRNA Networks in a Senescence-Accelerated Mouse Prone 8 Brain**

**Shuai Zhang, Dina Zhu, Hong Li, Hejian Li, Chengqiang Feng, and Wensheng Zhang**

Figure S1

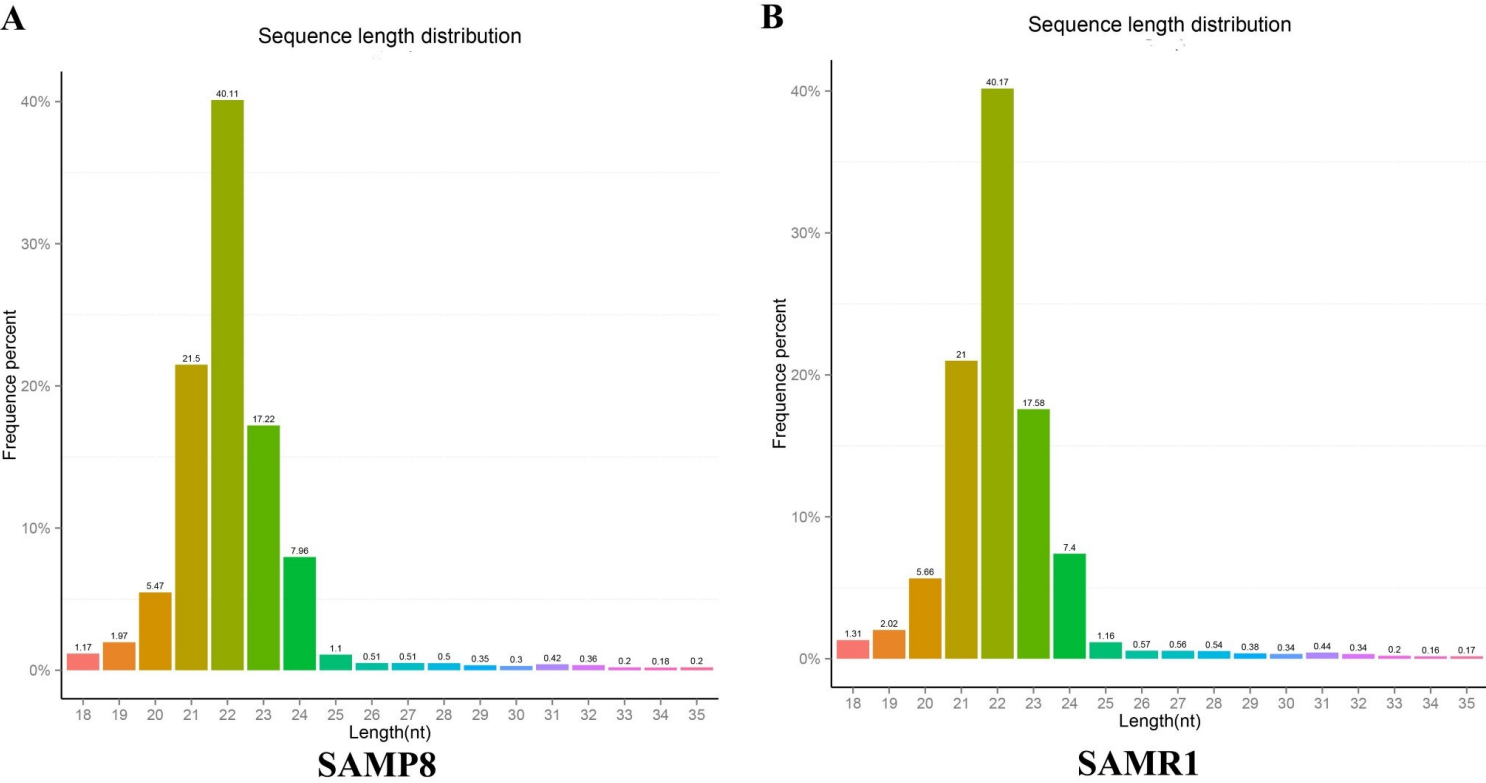

**Figure S1. Sequence length distribution of small RNA in SAMP8 and SAMR1 mice. (A)** Sequence length distribution in SAMP8 mice. **(B)** Sequence length distribution in SAMR1 mice.

**Table S1. Primers used in qPCR analysis**

| Acession No.       | Primer sequence (5`-3`)   | primer direction | product size |
|--------------------|---------------------------|------------------|--------------|
| ENSMUST00000024823 | CGGCTACTGGATTGAGA         | forward primer   | 99           |
|                    | CTTTGTTCCCGCTGTC          | reverse primer   |              |
| ENSMUST00000110690 | AAACTCCTGTCCTCTGGGCTTCG   | forward primer   | 142          |
|                    | ATCTTTTACAGCTTCCACGGGAT   | reverse primer   |              |
| ENSMUST00000167323 | CATCGTCTTCTTCGGCTCAC      | forward primer   | 152          |
|                    | GCTGCTCACTAAGTTCATCCA     | reverse primer   |              |
| mm10_circ_0011857  | ATGGTCTGGTTCGGCAAGC       | forward primer   | 106          |
|                    | GAGCGATGGGTCGTAGGTAA      | reverse primer   |              |
| mm10_circ_0007422  | TGATGATATCCGCCAGACA       | forward primer   | 106          |
|                    | CAGGACTAAAACCTTCTCGCACTG  | reverse primer   |              |
| mm10_circ_0013361  | AGACAGTGATCCTCCCATTCA     | forward primer   | 136          |
|                    | TTCTTCAGACATCATCAGTGGC    | reverse primer   |              |
| mmu-miR-7019-3p    | ACATATATCACCTTGGCCGCC     | forward primer   | 74           |
|                    | TATGGTTGTTACGACTCCTTCAC   | reverse primer   |              |
| mmu-miR-466q       | GGCAAGTGCACACACACAC       | forward primer   | 71           |
|                    | TATGGTTTTGACGACTGTGTGAT   | reverse primer   |              |
| mmu-let-7g-3p      | GCACATACATGGTGCACACACA    | forward primer   | 70           |
|                    | TATGGTTGTTACGACTCCTTCAC   | reverse primer   |              |
| U6                 | CAGCACATATACTAAAATTGGAACG | forward primer   | 76           |
|                    | ACGAATTTGCGTGTTCATCC      | reverse primer   |              |
| $\beta$ -Actin     | GCCCATCTACGAGGGCTAT       | forward primer   | 147          |
|                    | ATGTCACGCACGATTTCC        | reverse primer   |              |

**Table S3. Significantly and differentially expressed miRNA transcripts between SAMP8 and SAMR1 mice**

| sRNA              | SAMR1_readcount | SAMP8_readcount | $\log_2^{\text{FoldChange}}$ | pval       |
|-------------------|-----------------|-----------------|------------------------------|------------|
| mmu-miR-3086-5p   | 2.207373438     | 72.62548772     | -3.3761                      | 3.50E-24   |
| mmu-miR-466q      | 0               | 23.66608457     | -2.6907                      | 5.82E-13   |
| mmu-let-7a-5p     | 68025.34354     | 54718.33238     | 0.31185                      | 6.32E-07   |
| mmu-miR-181d-5p   | 4965.527081     | 6006.41333      | -0.2723                      | 4.90E-05   |
| mmu-let-7g-5p     | 448676.6117     | 368188.6576     | 0.28232                      | 0.00020599 |
| mmu-miR-344-3p    | 5177.433908     | 7226.426387     | -0.46674                     | 0.00024286 |
| mmu-miR-221-5p    | 4562.344165     | 3809.130442     | 0.25844                      | 0.00045981 |
| mmu-miR-30e-3p    | 9940.051867     | 8161.14345      | 0.28151                      | 0.00050191 |
| mmu-miR-219b-5p   | 2155.285501     | 1208.686225     | 0.75696                      | 0.0005365  |
| mmu-miR-144-3p    | 15.74204162     | 65.87510204     | -1.2477                      | 0.00069635 |
| mmu-miR-122-5p    | 26.55221656     | 89.89337916     | -1.1781                      | 0.00086852 |
| mmu-miR-551b-3p   | 94.71884185     | 205.0504622     | -0.91206                     | 0.0015702  |
| mmu-miR-138-5p    | 4130.69484      | 5307.460187     | -0.35343                     | 0.0016526  |
| mmu-miR-744-5p    | 4227.856839     | 3460.486003     | 0.28446                      | 0.0020397  |
| mmu-miR-30b-3p    | 285.6550283     | 213.8102253     | 0.40347                      | 0.0023108  |
| mmu-miR-455-3p    | 170.2339162     | 118.0757926     | 0.49072                      | 0.0024029  |
| mmu-miR-3065-3p   | 1958.957482     | 1300.204444     | 0.5529                       | 0.0028     |
| mmu-miR-338-5p    | 1997.940091     | 1329.581848     | 0.54931                      | 0.0029962  |
| mmu-miR-219a-2-3f | 12372.53421     | 8339.371718     | 0.53416                      | 0.0032678  |
| mmu-miR-466i-5p   | 29.37106327     | 9.308007664     | 1.0404                       | 0.00423    |
| mmu-miR-7a-1-3p   | 522.9449924     | 416.9477258     | 0.31917                      | 0.0045518  |
| mmu-miR-30c-5p    | 81923.16111     | 65829.9945      | 0.30861                      | 0.0052923  |
| mmu-let-7c-5p     | 123416.9698     | 101959.5811     | 0.2709                       | 0.0054639  |
| mmu-miR-21a-5p    | 48315.68007     | 36703.76465     | 0.38273                      | 0.0058751  |
| mmu-miR-7019-3p   | 0               | 3.466885077     | -0.92191                     | 0.0061499  |
| mmu-let-7g-3p     | 14.41850254     | 31.68328894     | -0.86017                     | 0.0071926  |
| mmu-miR-466b-5p   | 2.820977233     | 9.738081367     | -0.99696                     | 0.0075774  |
| mmu-miR-128-1-5p  | 568.311237      | 399.8551909     | 0.47398                      | 0.0084636  |
| mmu-miR-378c      | 1429.041877     | 1786.423398     | -0.31289                     | 0.0089111  |
| mmu-miR-1839-5p   | 5148.845716     | 4363.856225     | 0.23522                      | 0.0095727  |

## **Supplemental Method 1. The detailed methods of miRNA-seq**

### **Library preparation and sequencing**

A total of six cDNA libraries were constructed, i.e., three for SAMP8 mice and another three for SAMR1 mice. We utilized 3 µg RNA per sample as input material for RNA sample preparation. Sequencing libraries were generated using NEBNext® Multiplex Small RNA Library Prep Set for Illumina® (NEB, USA.) following manufacturer's recommendations and index codes were added to attribute sequences to each sample. Briefly, NEB 3' SR Adaptor was directly, and specifically ligated to 3' end of miRNA, siRNA and piRNA. After the 3' ligation reaction, the SR RT Primer hybridized to the excess of 3' SR Adaptor (that remained free after the 3' ligation reaction) and transformed the single-stranded DNA adaptor into a double-stranded DNA molecule. This step is important to prevent adaptor-dimer formation, besides, dsDNAs are not substrates for ligation mediated by T4 RNA Ligase 1 and therefore do not ligate to the 5' SR Adaptor in the subsequent ligation step. 5'ends adapter was ligated to 5'ends of miRNAs, siRNA and piRNA. Then first strand cDNA was synthesized using M-MuLV Reverse Transcriptase (RNase H<sup>-</sup>). PCR amplification was performed using LongAmp Taq 2X Master Mix, SR Primer for illumina and index (X) primer. PCR products were purified on a 8% polyacrylamide gel (100V, 80 min). DNA fragments corresponding to 140~160 bp (the length of small noncoding RNA plus the 3' and 5' adaptors) were recovered and dissolved in 8 µL elution buffer. At last, library quality was assessed on the Agilent Bioanalyzer 2100 system using DNA High Sensitivity Chips.

The clustering of the index-coded samples was performed on a cBot Cluster Generation System using TruSeq SR Cluster Kit v3-cBot-HS (Illumina) according to the manufacturer's instructions. After cluster generation, the library preparations were sequenced at the Novogene Bioinformatics Institute (Beijing, China) on an Illumina HiSeq 2500/2000 platform and 50bp single-end reads were generated.

### **Data analysis**

This section contained Quality control (QC), Reads mapping to the reference sequence, Known miRNA alignment, Remove tags from these sources (protein-coding genes, repeat sequences, rRNA, tRNA, snRNA, and snoRNA), Novel miRNA prediction, Small RNA annotation summary, miRNA editing analysis, miRNA family analysis, and Target gene prediction.

## **Supplemental Method 2. The detailed methods of circRNA-seq**

### **Library preparation and sequencing**

A total of six cDNA libraries were constructed, i.e., three for SAMP8 mice and another three for SAMR1 mice. We utilized 5  $\mu$ g RNA per sample as input material for RNA sample preparation. Firstly, ribosomal RNAs were depleted by using Epicentre Ribo-zero™ rRNA Removal Kit (Epicentre, USA) to get rRNA-depleted RNAs. rRNA-depleted RNAs were further treated with RNase R (Epicentre, USA) and then were subjected to Trizol extraction. Subsequently, sequencing libraries were generated using the rRNA-depleted and RNase R digested RNAs by NEBNext® Ultra™ Directional RNA Library Prep Kit for Illumina® (NEB, USA) following manufacturer's recommendations. Briefly, fragmentation was carried out using divalent cations under elevated temperature in NEBNext First Strand Synthesis Reaction Buffer. First strand cDNA was synthesized using random hexamer primer and M-MuLV Reverse Transcriptase (RNaseH-). Second strand cDNA synthesis was subsequently performed using DNA Polymerase I and RNase H. In the reaction buffer, dNTPs with dTTP were replaced by dUTP. Remaining overhangs were converted into blunt ends via exonuclease/polymerase activities. After adenylation of 3' ends of DNA fragments, NEBNext Adaptor with hairpin loop structure were ligated to prepare for hybridization. In order to select cDNA fragments of preferentially 150-200 bp in length, the library fragments were purified with AMPure XP system (Beckman Coulter, Beverly, USA). Then 3  $\mu$ l USER Enzyme (NEB, USA) was used with size-selected, adaptor-ligated cDNA at 37°C for 15 min followed by 5 min at 95°C before PCR. PCR was performed with Phusion High-Fidelity DNA polymerase, Universal PCR primer and Index (X) Primer. Finally, the library was purified (AMPure XP system) and then qualified by the Agilent Bioanalyzer 2100 system.

The clustering of the index-coded samples was performed on a cBot Cluster Generation System using HiSeq PE Cluster Kit v4 cBot (Illumina) according to the manufacturer's instructions. After cluster generation, the library preparations were sequenced at the Novogene Bioinformatics Institute (Beijing, China) on an Illumina HiSeq 2500 platform and 125bp paired-end reads were generated.

### **Data analysis**

This section contained Quality control (QC), Mapping to reference genome, circRNA identification and miRNA binding site prediction.
